# Supplementary material for: Impact of complementary feeding on infant gut microbiome, metabolites and early development
Source: Royal Society of Chemistry journal article supplement (doi:10.1039/d4fo03948c), 2024-01-01
Supplement: d4fo03948c1.pdf [file d4fo03948c1.pdf]

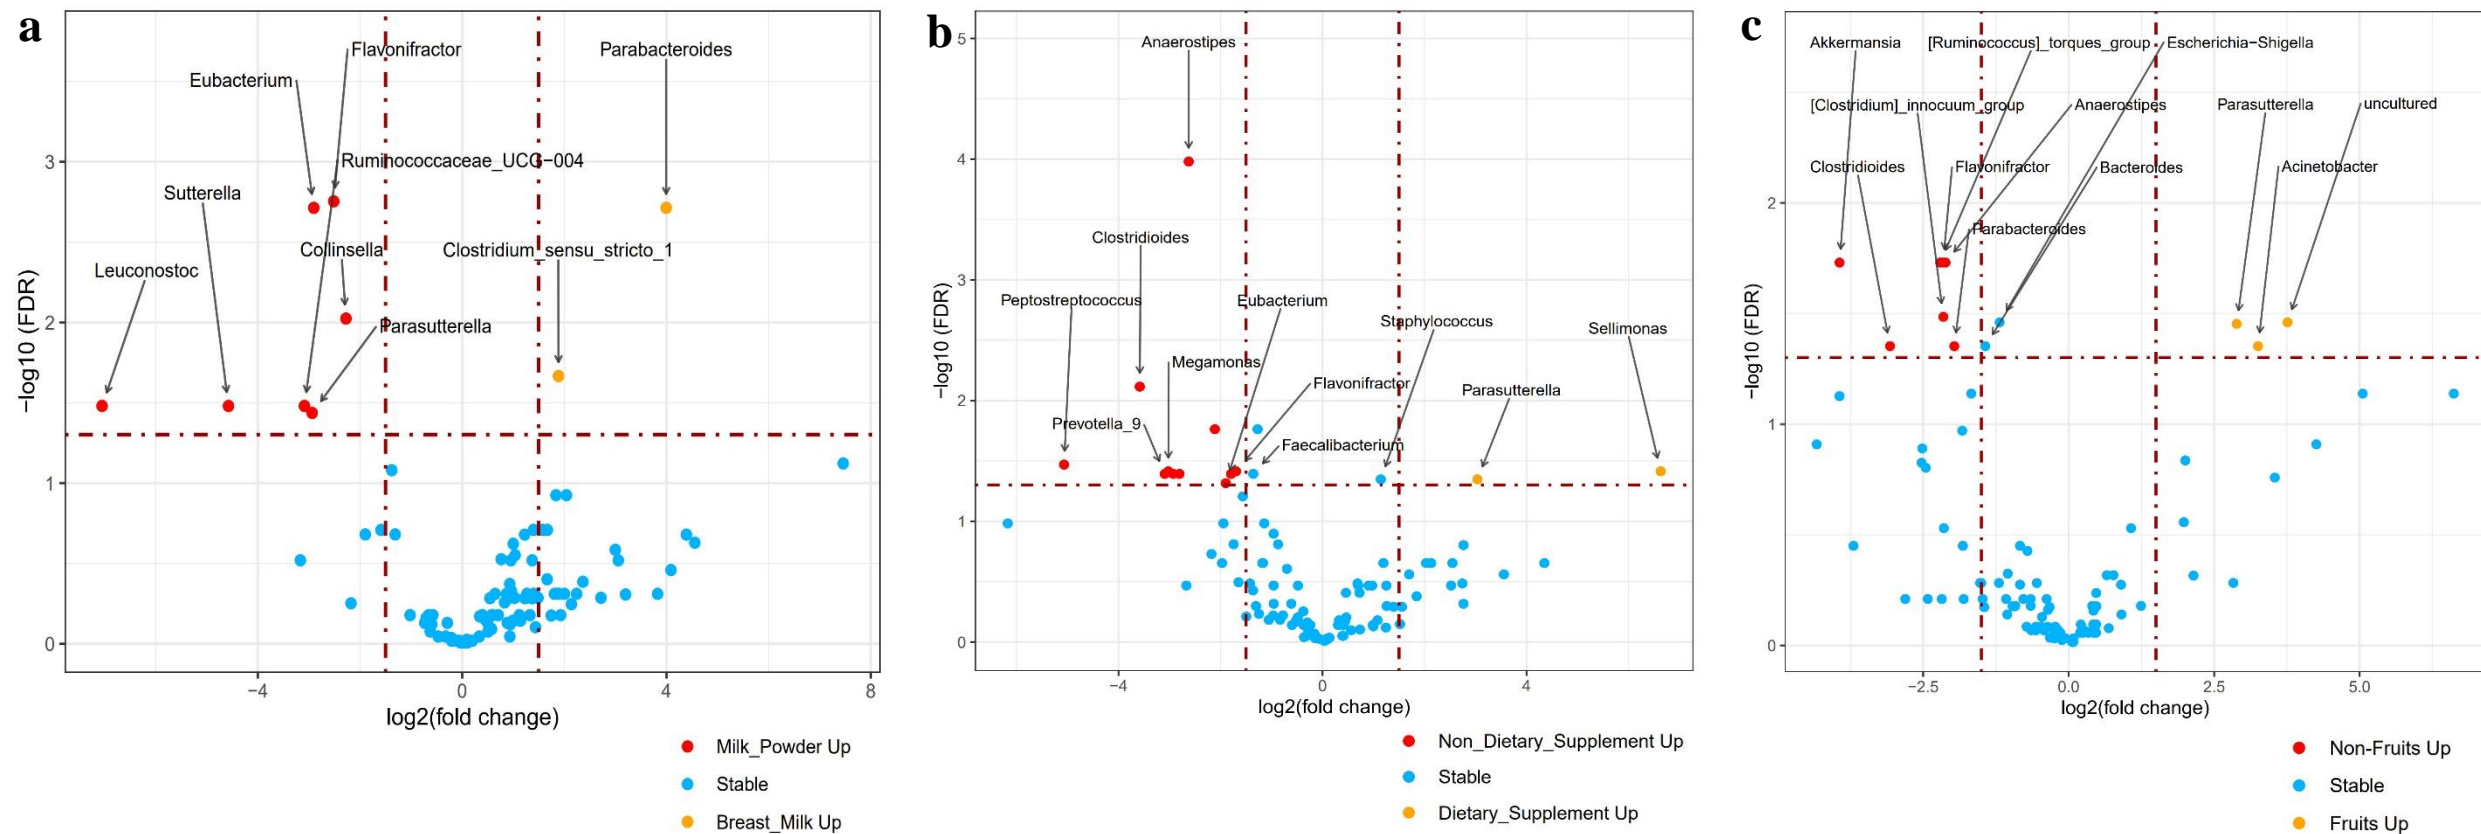

**Figure S1** Differential composition of infant gut microbiota at week 32, influenced by (a) breastfeeding, (b) dietary supplements, and (c) fruit and non-fruit diets during Weaning. The significance was determined by false discovery rate < 0.05

**a**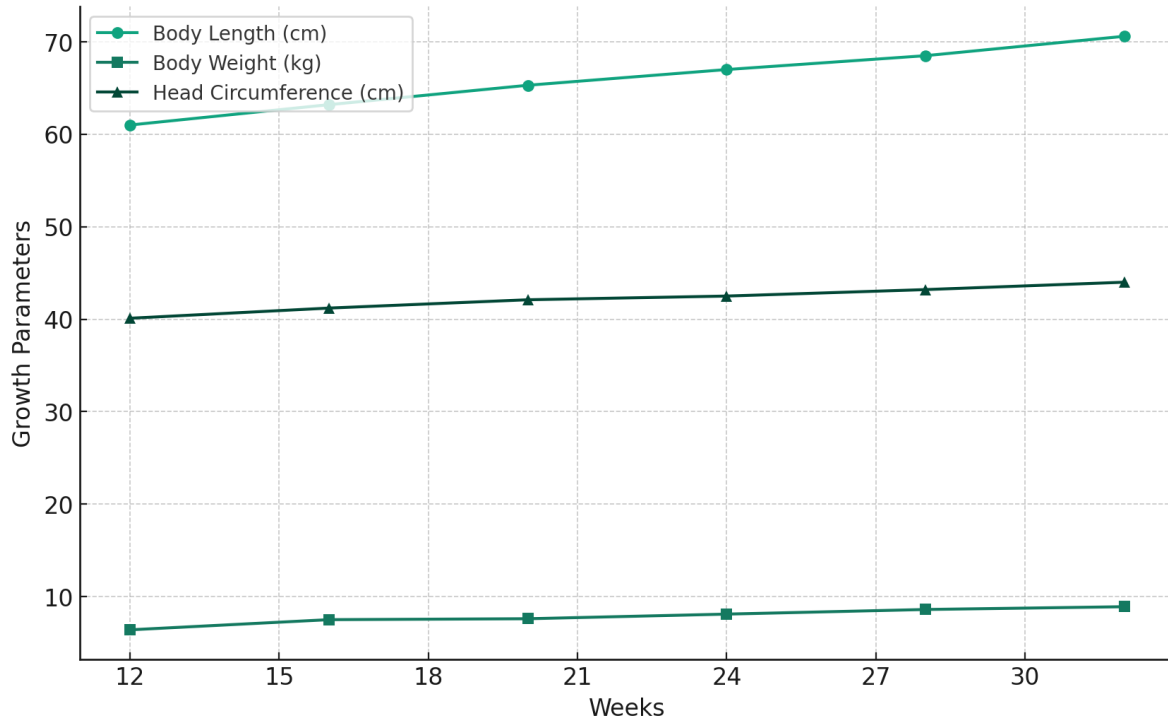**b**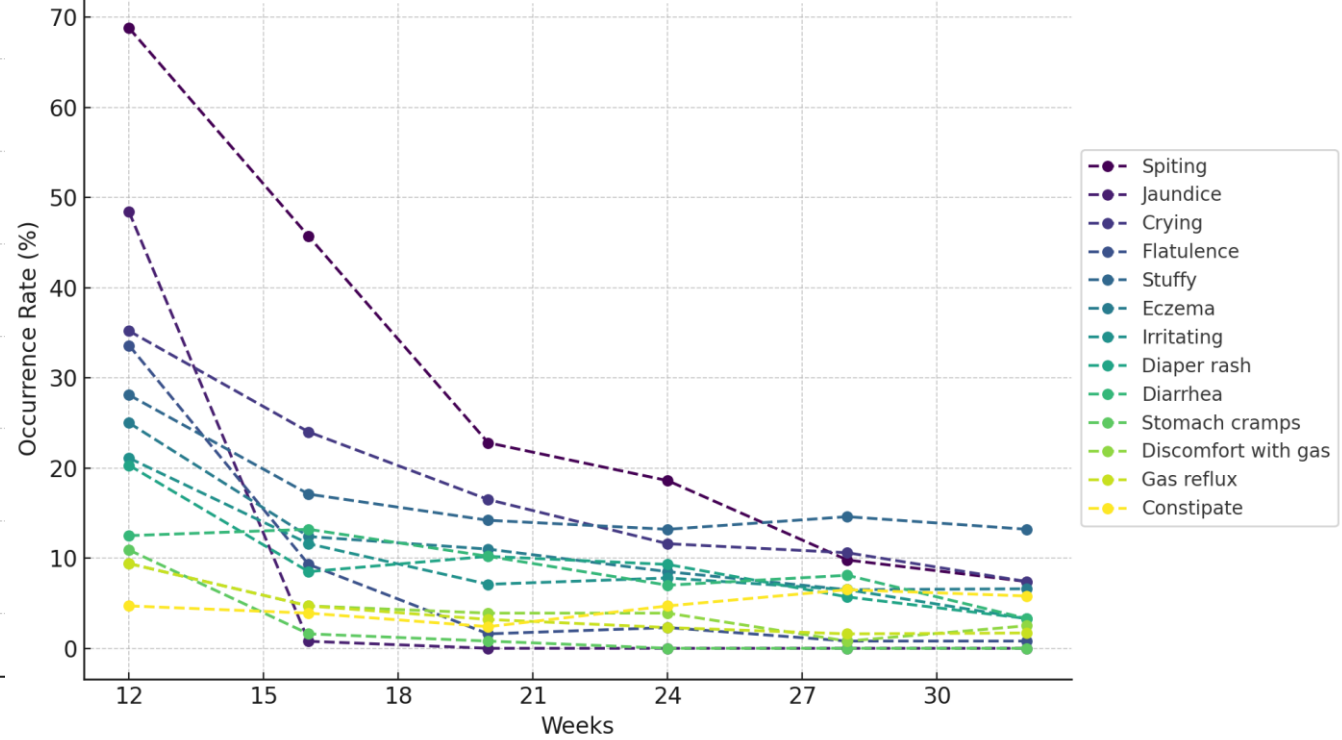

**Figure S2** Infant growth parameters and health status during weaning period
