# Supplementary material for: Impact of complementary feeding on infant gut microbiome, metabolites and early development
Source: Royal Society of Chemistry journal article supplement (doi:10.1039/d4fo03948c), 2024-01-01
Supplement: d4fo03948c2.xlsx [file d4fo03948c2.xlsx]

## Sheet: Table S1
Demographic	Statistics
Maternal Age at Delivery	31.7 ± 4.4
Infant Gender	Male = 52.3%
	Female = 47.7%
Delivery Mode	Vaginal delivery= 68%
	Cesarean delivery = 32%
Educational Background	Father: 69.8% University or College Graduation
	Mother: 68.7% University or College Graduation
Monthly Expenses	Family income = $2300 USD (100%)
	Living cost $1450 USD (63%)
	Childcare expenses = $145 USD (6.3%)
