# Supplementary material for: Impact of complementary feeding on infant gut microbiome, metabolites and early development
Source: Royal Society of Chemistry journal article supplement (doi:10.1039/d4fo03948c), 2024-01-01
Supplement: d4fo03948c3.xlsx [file d4fo03948c3.xlsx]

## Sheet: Table S4
Category	Profile
Fecal metabolites
Short Chain Fatty Acid	Formic Acid, Lactic Acid, Glycoaldehyde, Acetic Acid, Propionic Acid, Isobutyric Acid, Butyric Acid, Isovaleric Acid, Pentanoic acid
Monosaccharides	Mannose, Allose, Glucose, Galactose, Xylose, Arabinose
HMOs	2'FL, 3'FL, LNT, LNnT,LNDFH_I, LNDFH_II, LNFP_II, DFpLNH_II, DFLNH_b, TFLNH, DFLNH_a, LNFP_III, MFpLNH_IV, LNFP_V, LDFT, IFLNH_III, LNH, IFLNH_I, LNnH,
Breastmilk metabolites
HMOs	2'FL, 3'FL, LNDFH_I, LNDFH_II, LNFP_II, DFpLNH_II, DFLNH_b, TFLNH, DFLNH_a, LNFP_III, DFLNO_I, LNFP_I, MFpLNH_IV, LNFP_V, MFLNH_III, LNT, MFLNH_I, DFpLNH_c, LNnT, DFLNnO_II, LDFT, TFiLNO, IFNLH_III, IFLNH_I, LNH, DFLNnO_I/II, LNnH, F-LNO
