# Supplementary material for: Impact of complementary feeding on infant gut microbiome, metabolites and early development
Source: Royal Society of Chemistry journal article supplement (doi:10.1039/d4fo03948c), 2024-01-01
Supplement: d4fo03948c4.xlsx [file d4fo03948c4.xlsx]

## Sheet: Table S3
Time （week）	Top Genera
	No.1	No.2	No.3	No.4	No.5
12	Bifidobacterium	Streptococcus	Shigella	Clostridium	Bacterioides
14	Bifidobacterium	Streptococcus	Shigella	Clostridium	Bacterioides
16	Bifidobacterium	Streptococcus	Clostridium	Shigella	Lactobacillus
18	Bifidobacterium	Streptococcus	Clostridium	Shigella	Erysipelatoclostridium
20	Bifidobacterium	Shigella	Streptococcus	Clostridium	Erysipelatoclostridium
21	Bifidobacterium	Shigella	Clostridium	Streptococcus	Erysipelatoclostridium
22	Bifidobacterium	Clostridium	Erysipelatoclostridium	Shigella	Streptococcus
23	Bifidobacterium	Streptococcus	Clostridium	Shigella	Erysipelatoclostridium
24	Bifidobacterium	Clostridium	Streptococcus	Lactobacillus	Shigella
25	Bifidobacterium	Streptococcus	Lactobacillus	Bacterioides	Shigella
26	Bifidobacterium	Shigella	Streptococcus	Lactobacillus	Clostridium
27	Bifidobacterium	Streptococcus	Clostridium	Shigella	Lactobacillus
28	Bifidobacterium	Streptococcus	Clostridium	Lactobacillus	Shigella
29	Bifidobacterium	Clostridium	Streptococcus	Shigella	Lactobacillus
30	Bifidobacterium	Streptococcus	Clostridium	Shigella	Lactobacillus
31	Bifidobacterium	Streptococcus	Clostridium	Shigella	Lactobacillus
32	Bifidobacterium	Clostridium	Streptococcus	Erysipelatoclostridium	Shigella
